# Supplementary material for: Automated tumour budding quantification by machine learning augments TNM staging in muscle-invasive bladder cancer prognosis
Source: PubMed Central journal article supplement (PMC6435679; doi:10.1038/s41598-019-41595-2), 2019-03-26
Supplement: 41598_2019_41595_MOESM3_ESM.pdf [file 41598_2019_41595_MOESM3_ESM.pdf]

**Title:** Automated tumour budding quantification by machine learning augments TNM staging in muscle-invasive bladder cancer prognosis.

**Authors:** Brieu Nicolas<sup>1</sup>, Gavriel G Christos<sup>2</sup>, Nearchou P Ines<sup>2</sup>, Harrison J David<sup>2</sup>, Schmidt Günter<sup>1</sup> and Caie D Peter<sup>2\*</sup>

<sup>1</sup>Definiens AG, Bernhard-Wicki-Straße 5, 80636 München, Germany.

<sup>2</sup>School of Medicine, University of St Andrews, North Haugh, St Andrews, Fife, KY16 9TF, UK.

Brieu Nicolas and Gavriel G Christos contributed equally to this work.

**Supplementary Material M2.** Qualitative results of the tumour mask segmentation algorithm, on the 10 FOVs provided in supplementary materials M2-M7. True positive pixels are in green, false positive pixels in yellow and false negative pixels in red. Note how artefacts are automatically removed from the analysis by the segmentation algorithm.

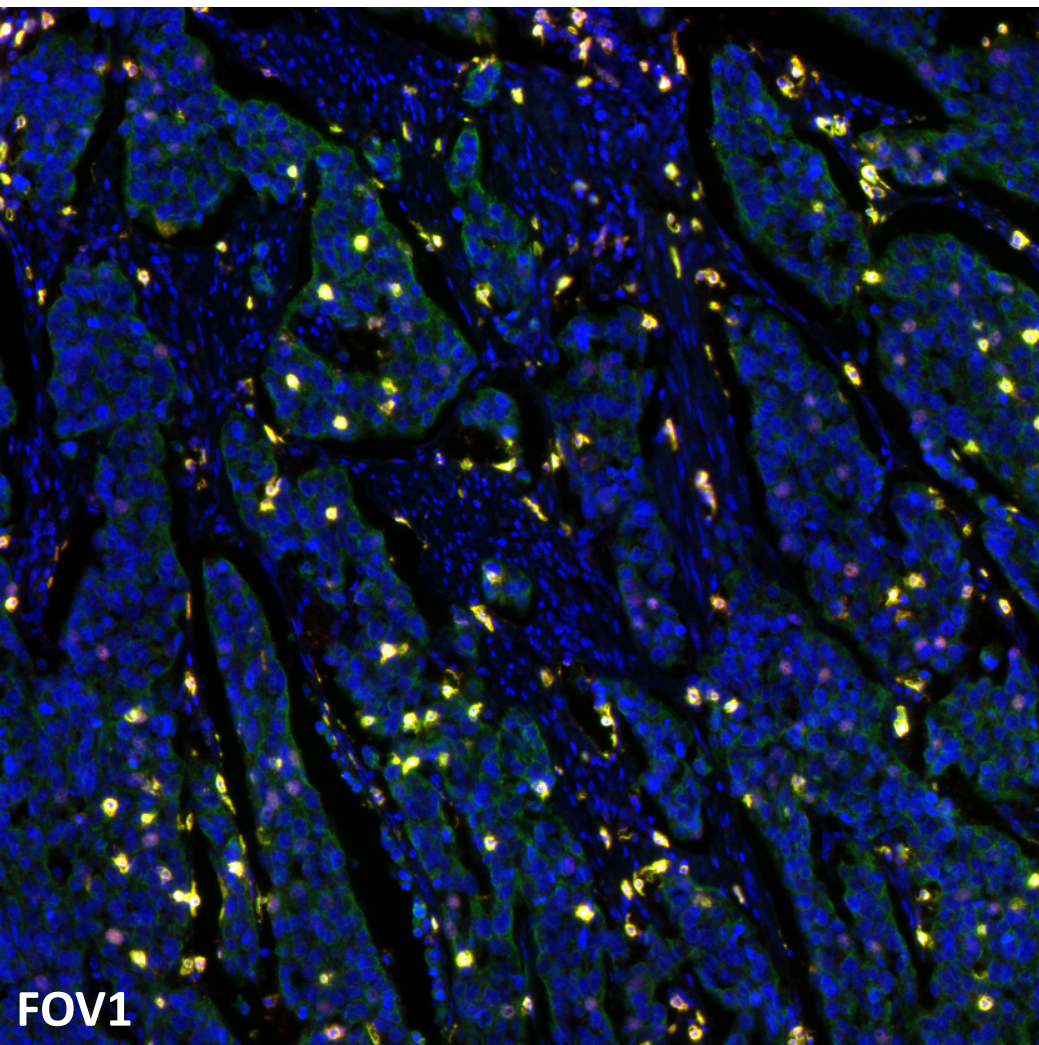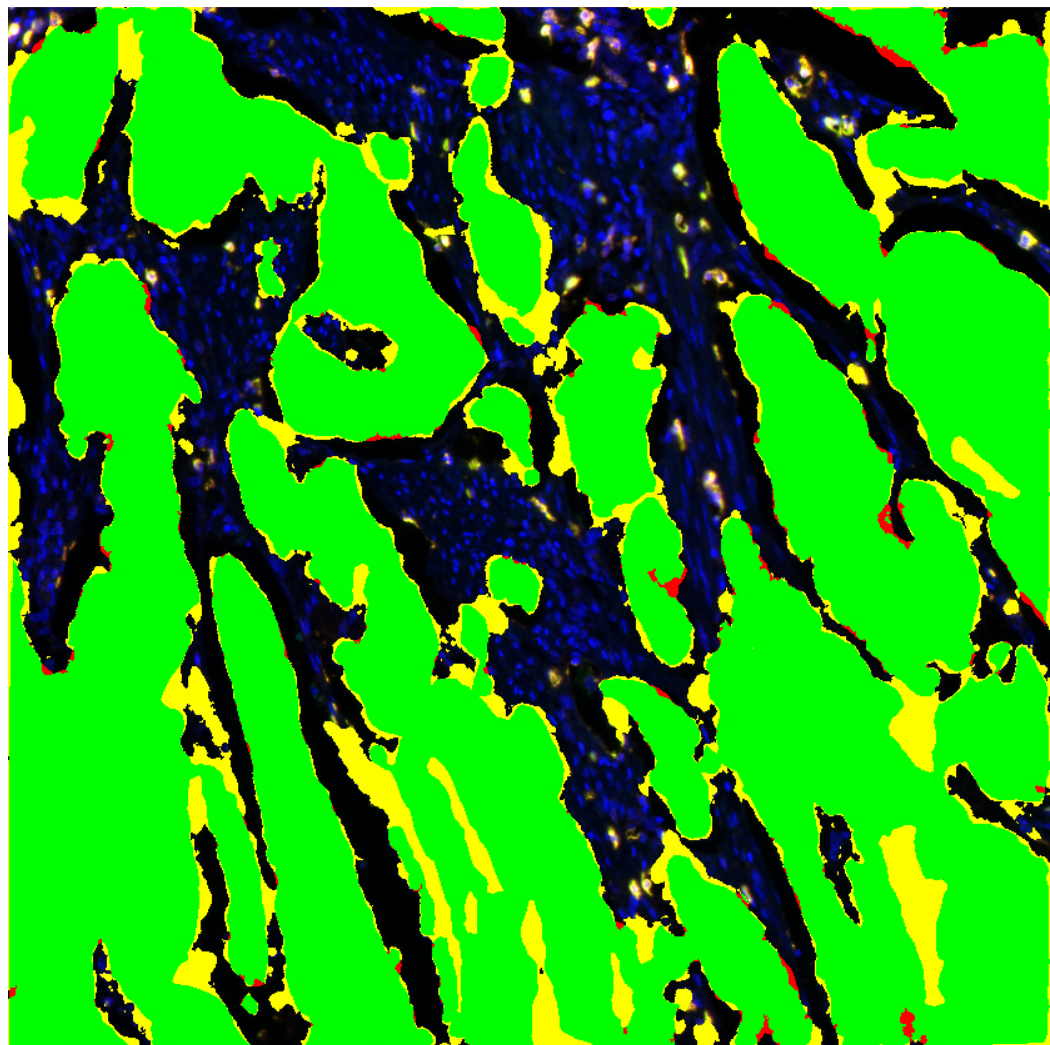

TP

FP

FN

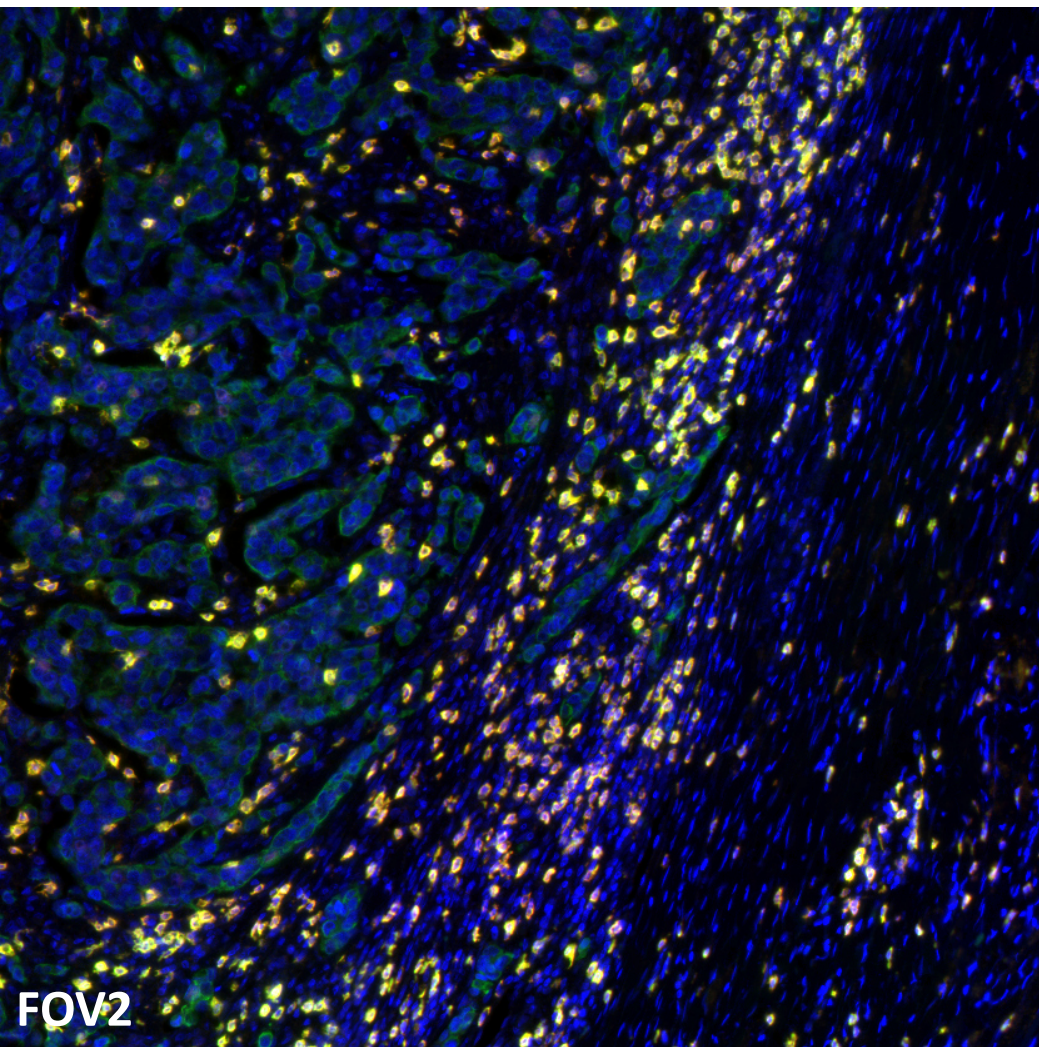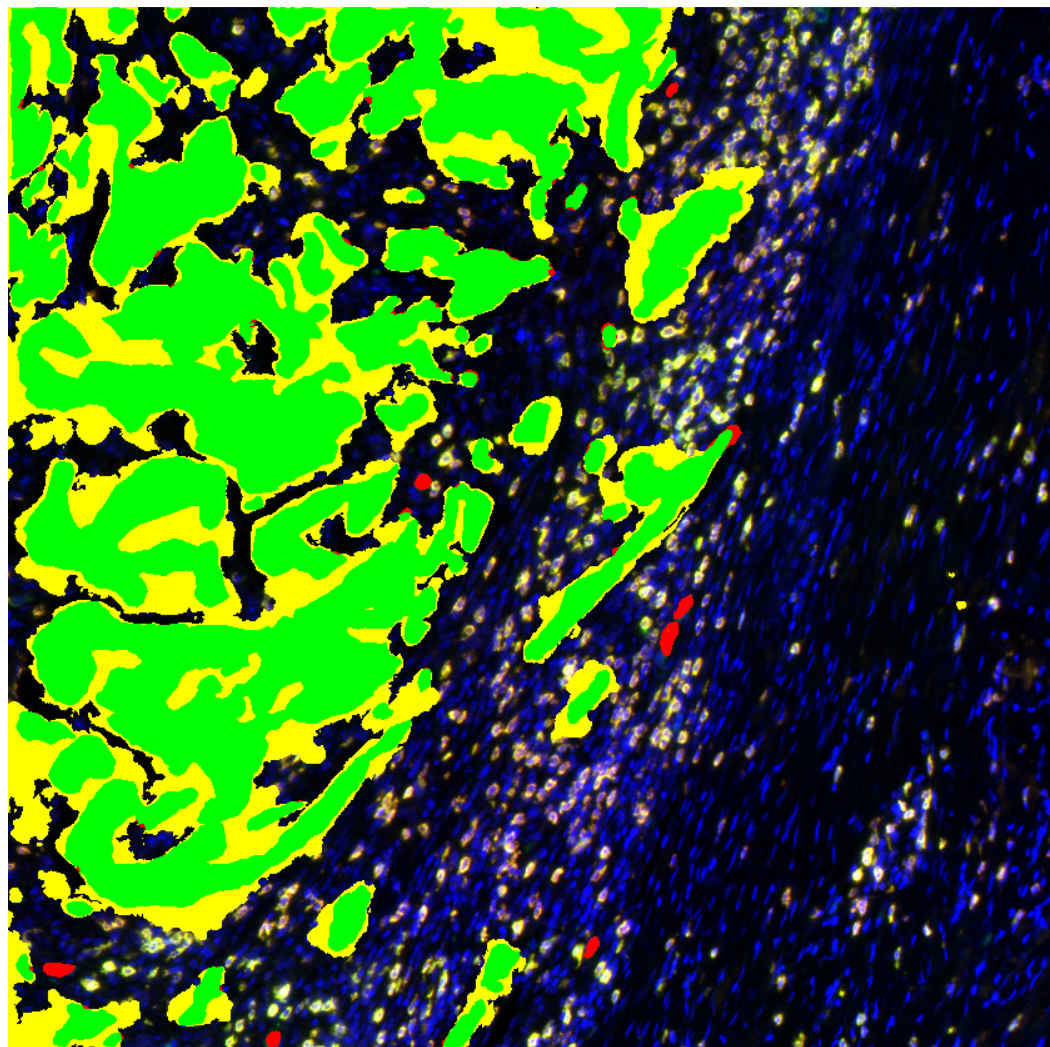

TP

FP

FN

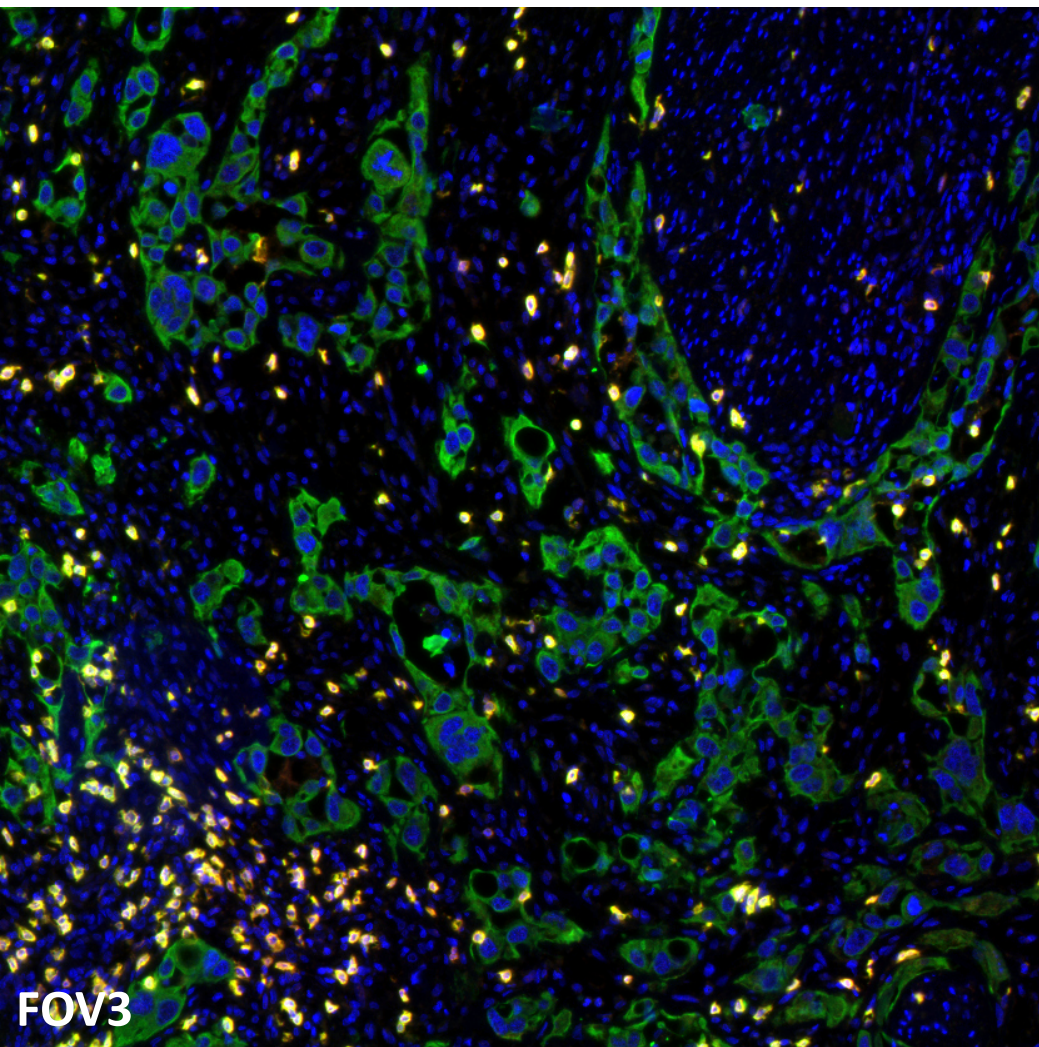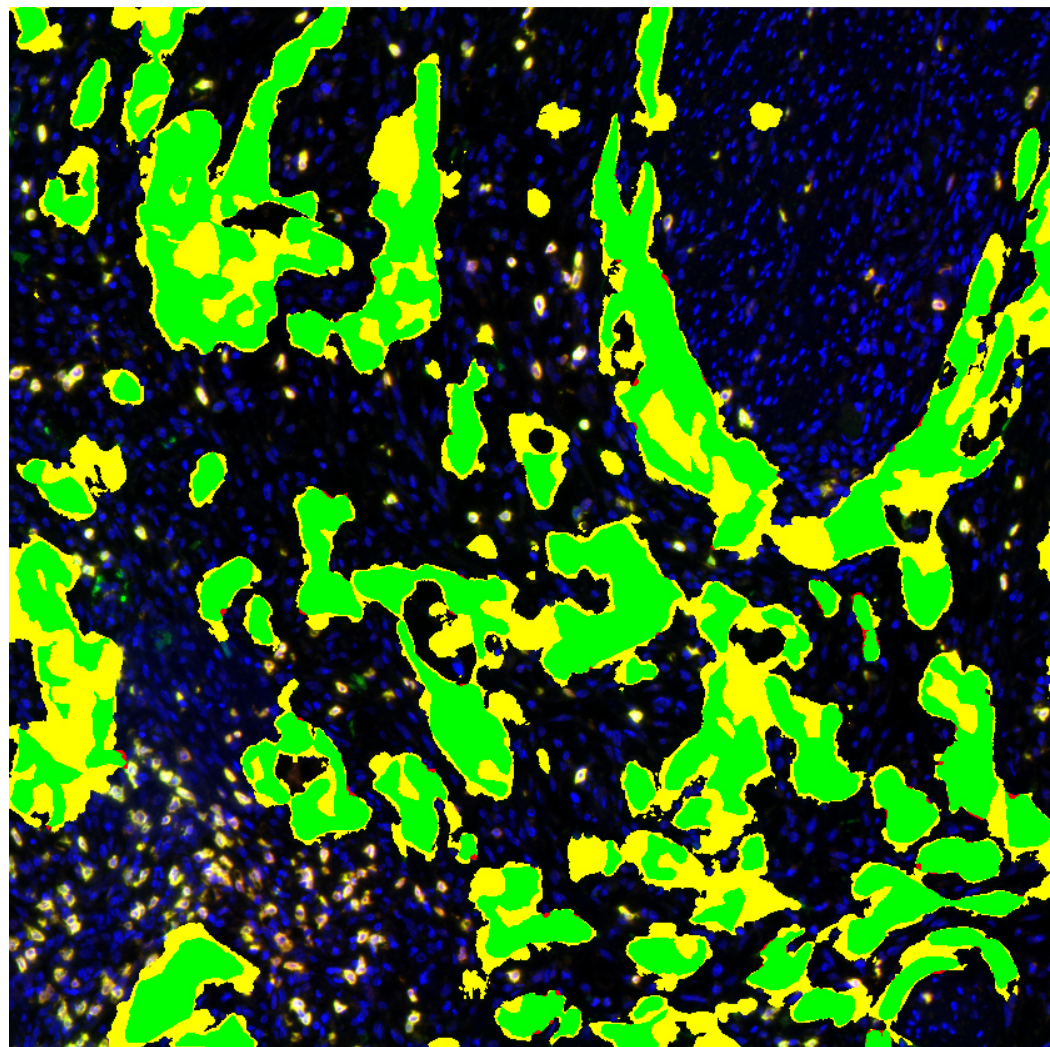

TP

FP

FN

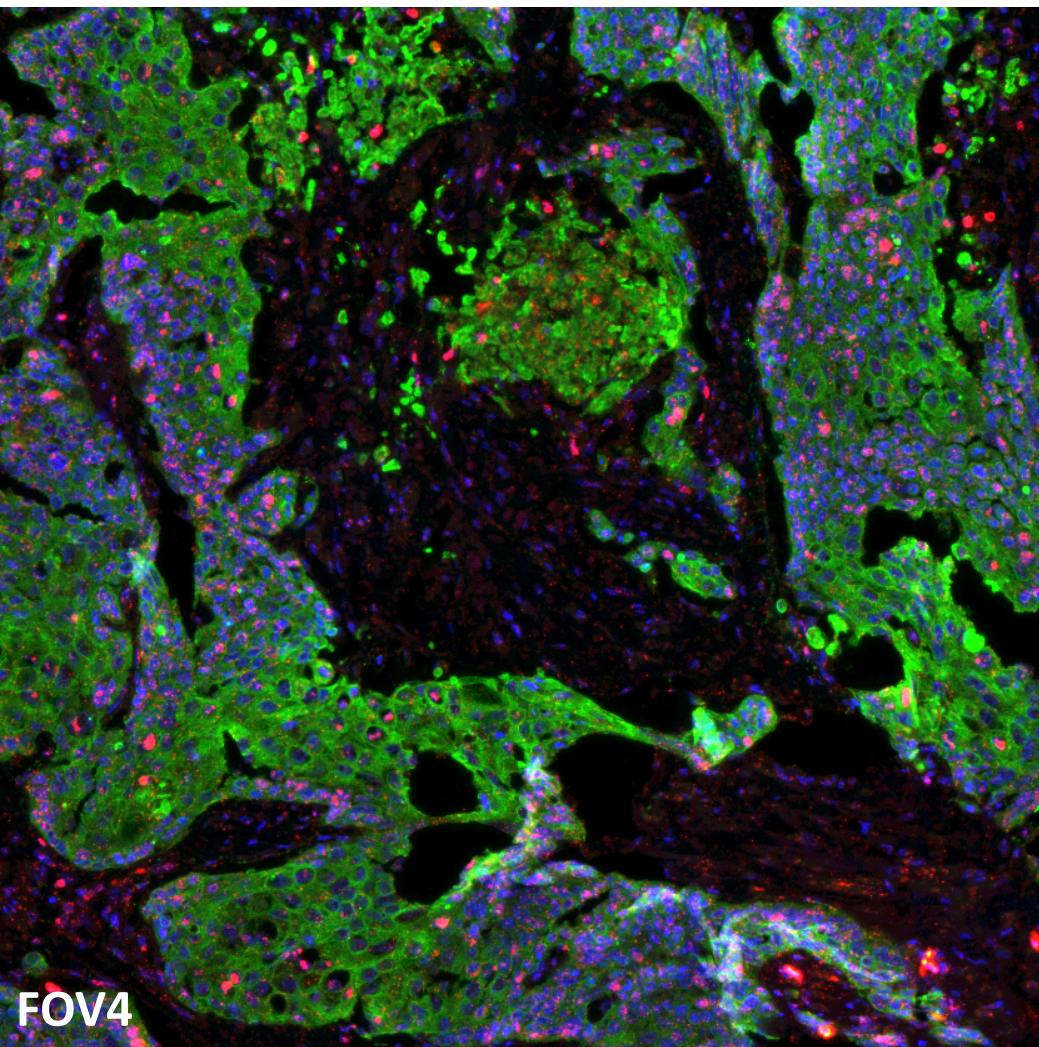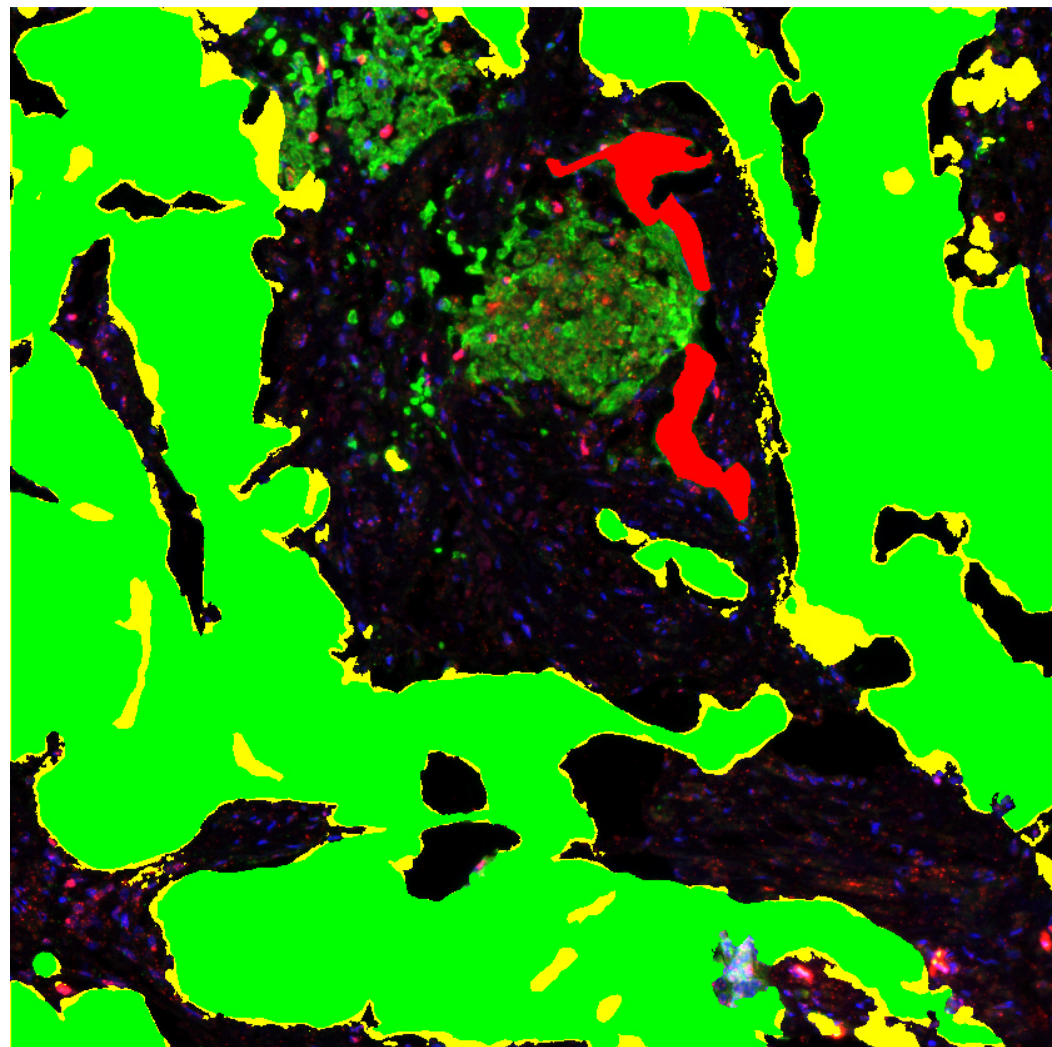

TP

FP

FN

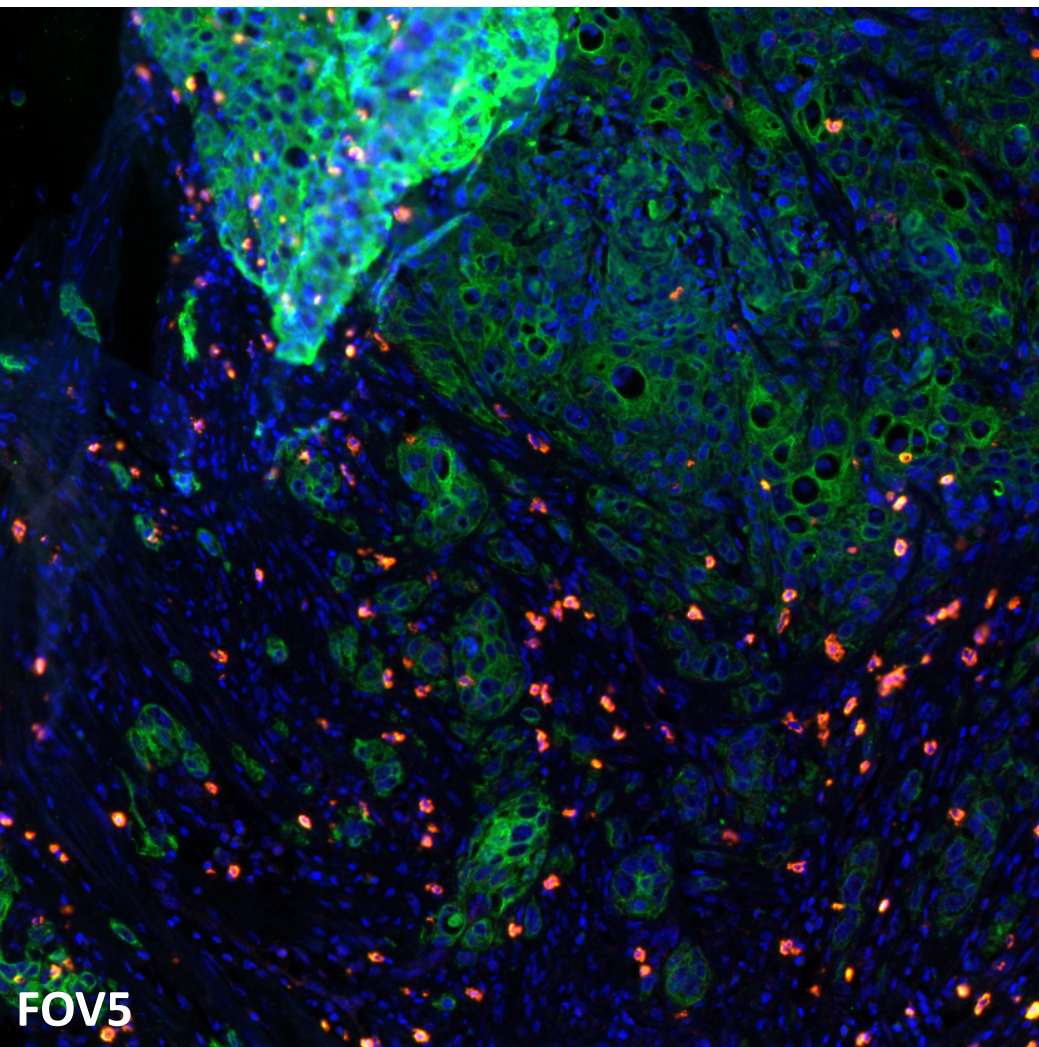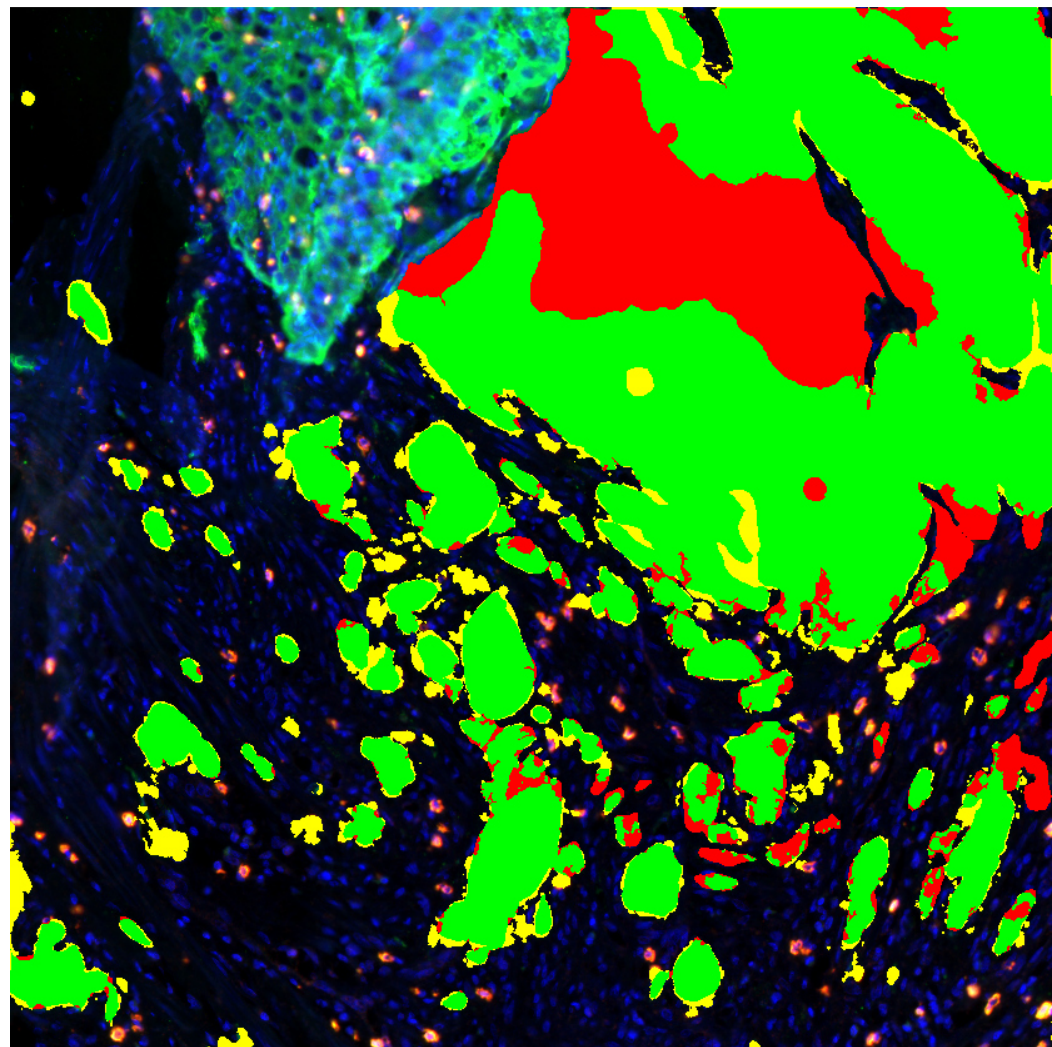

TP

FP

FN

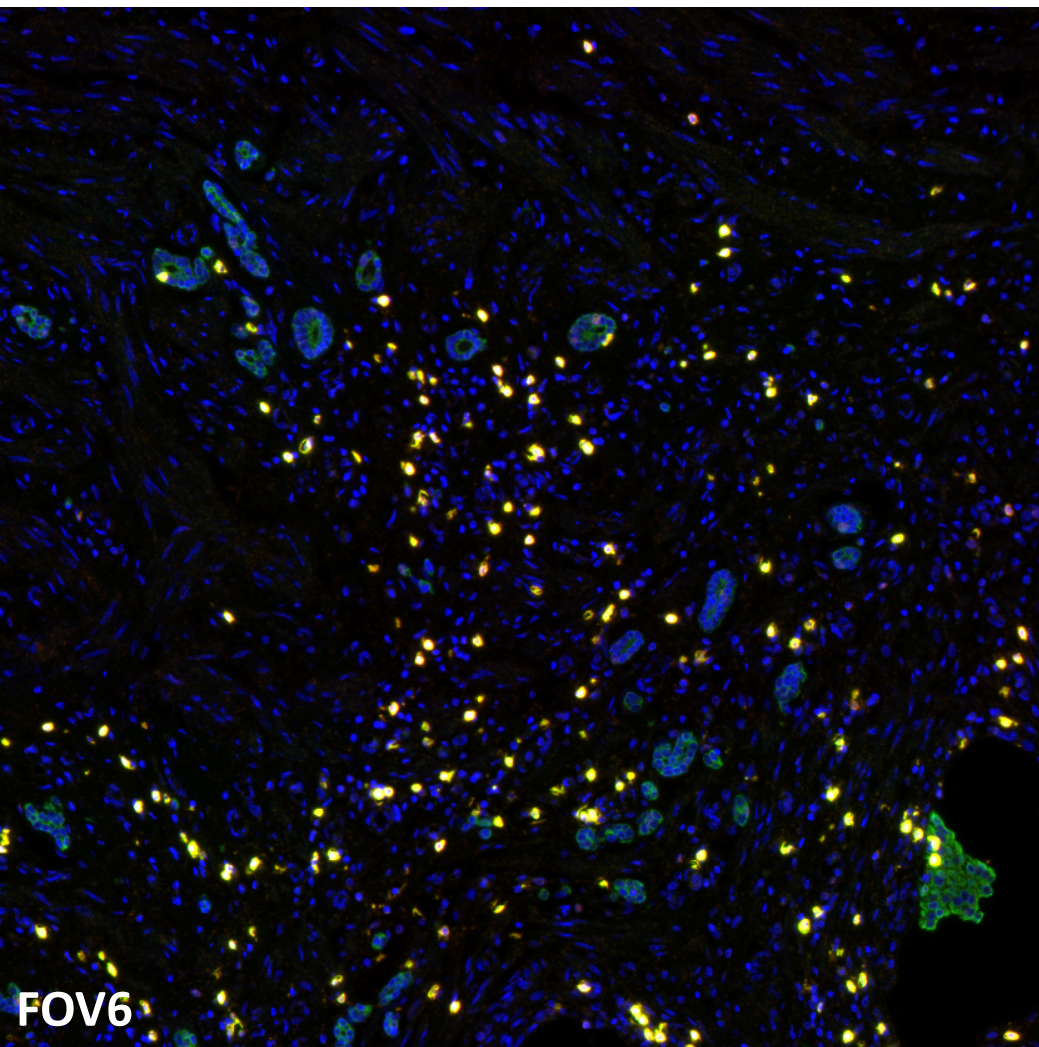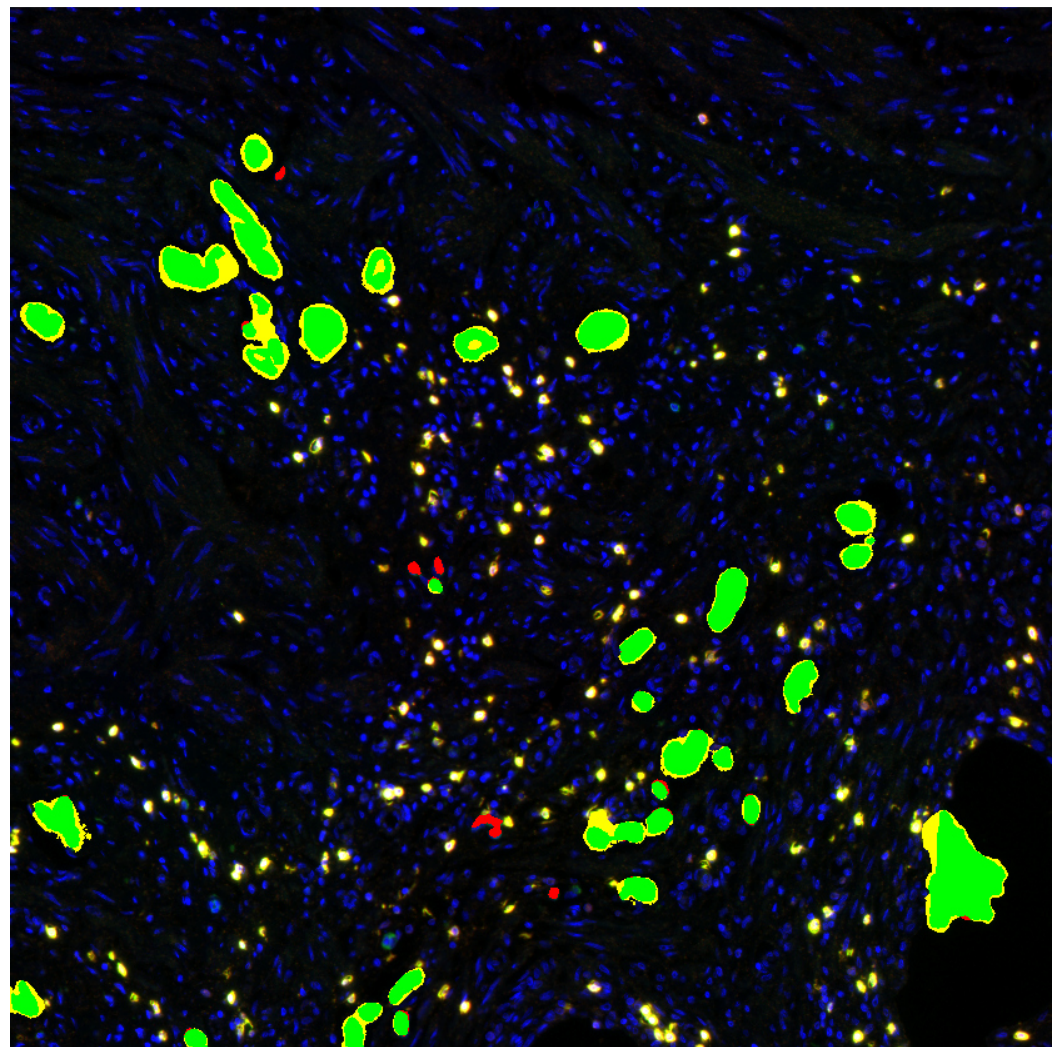

TP

FP

FN

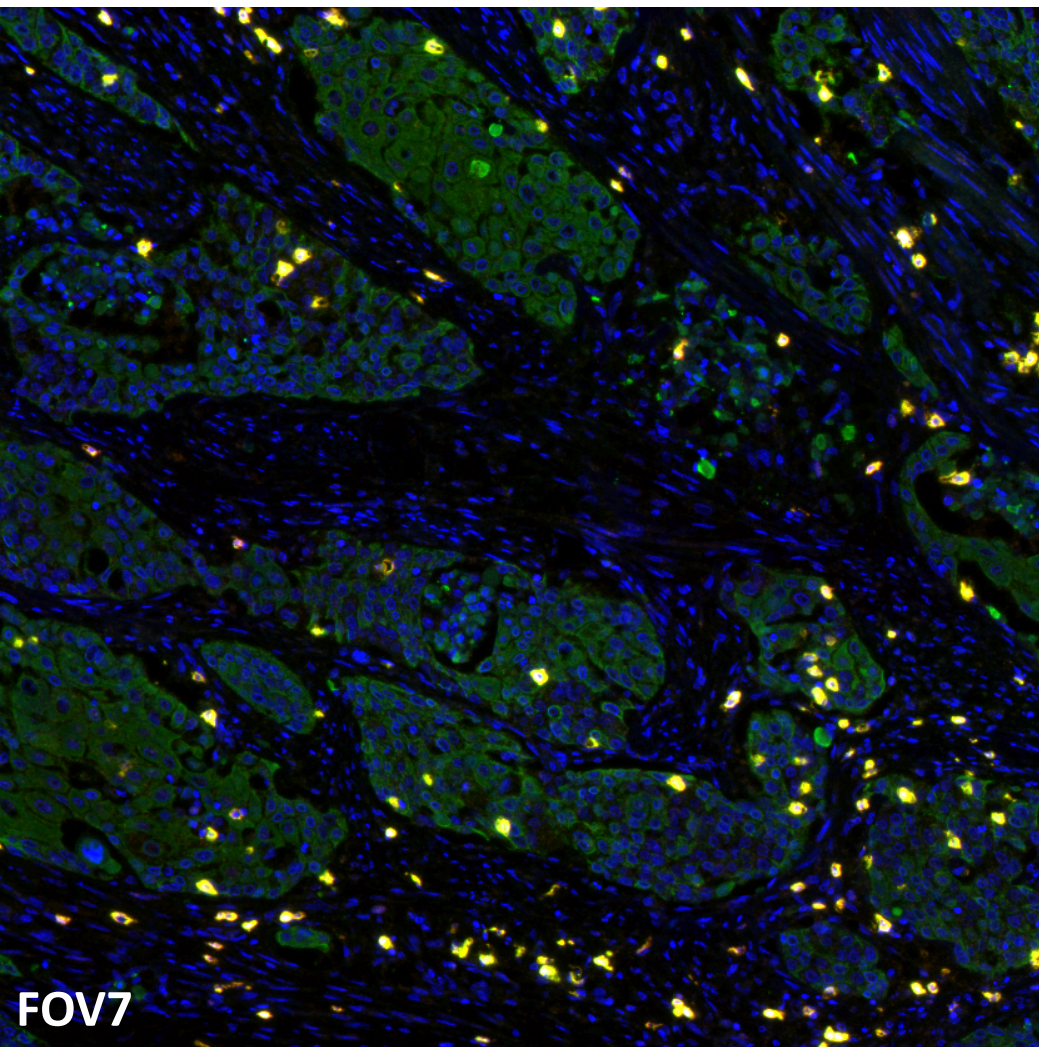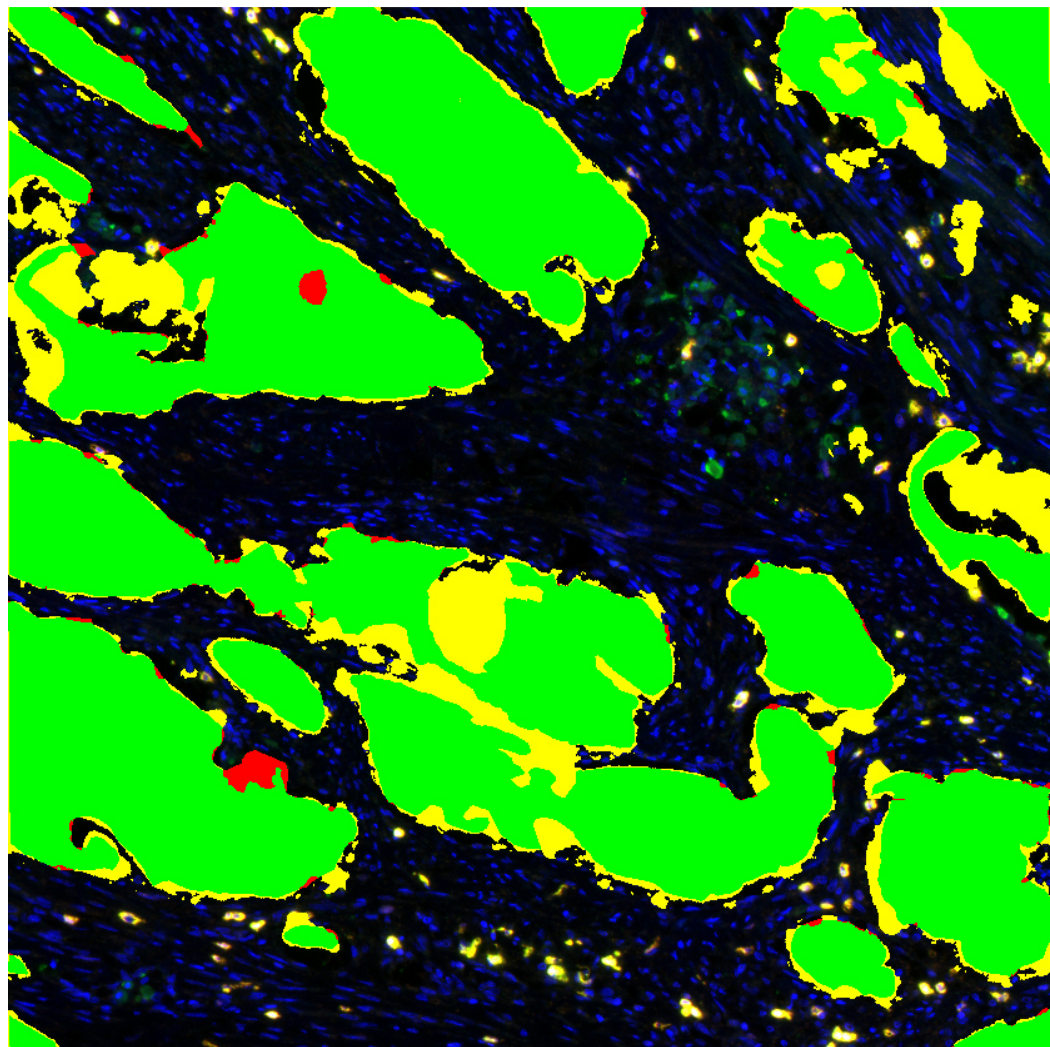

TP

FP

FN



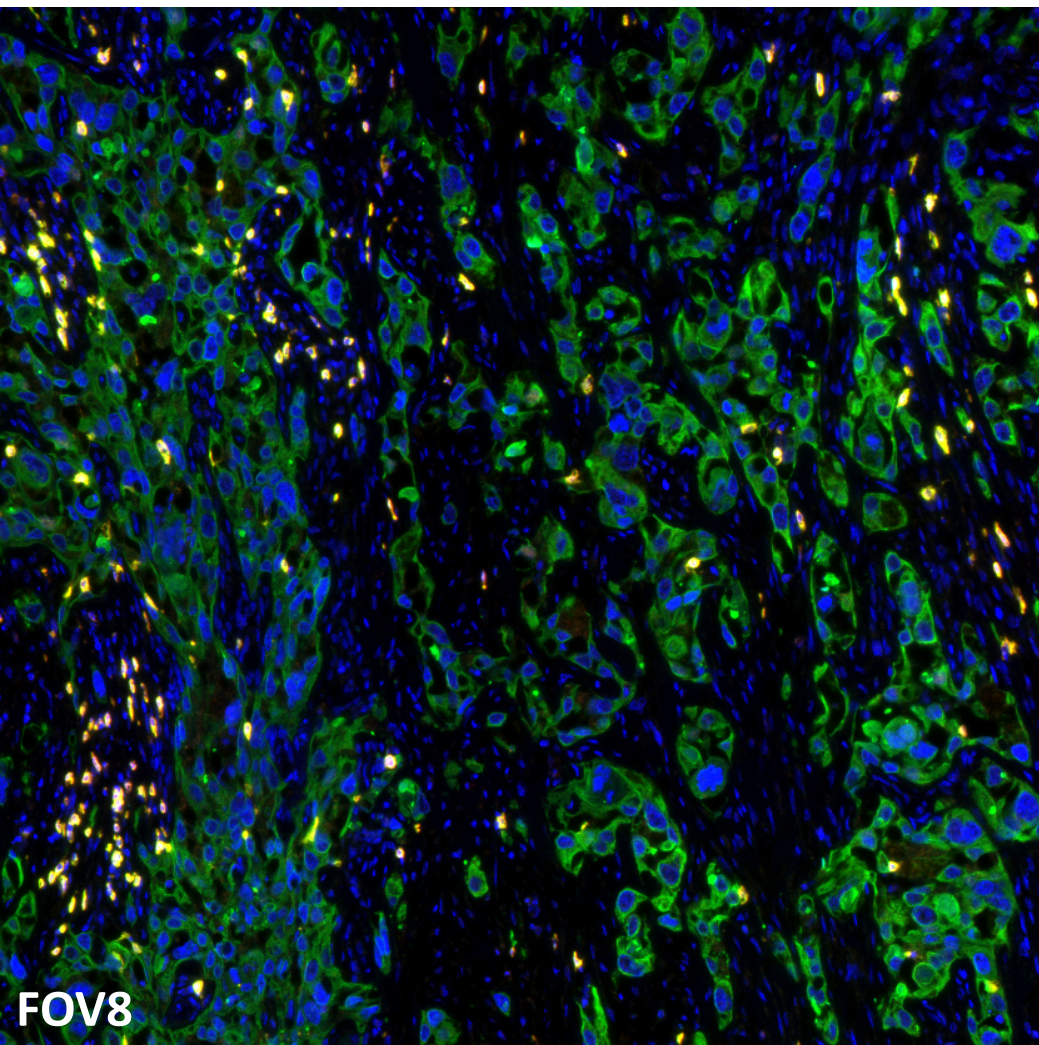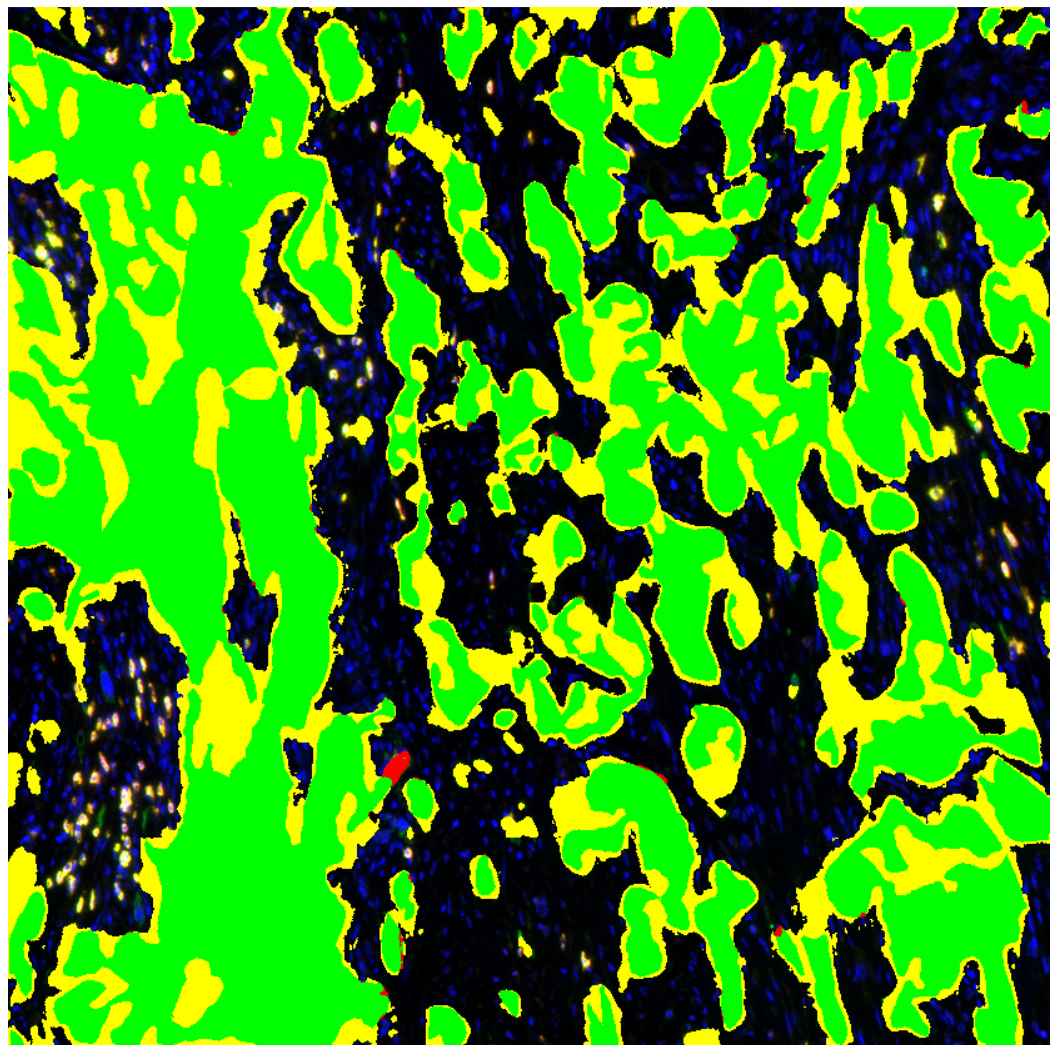

TP

FP

FN

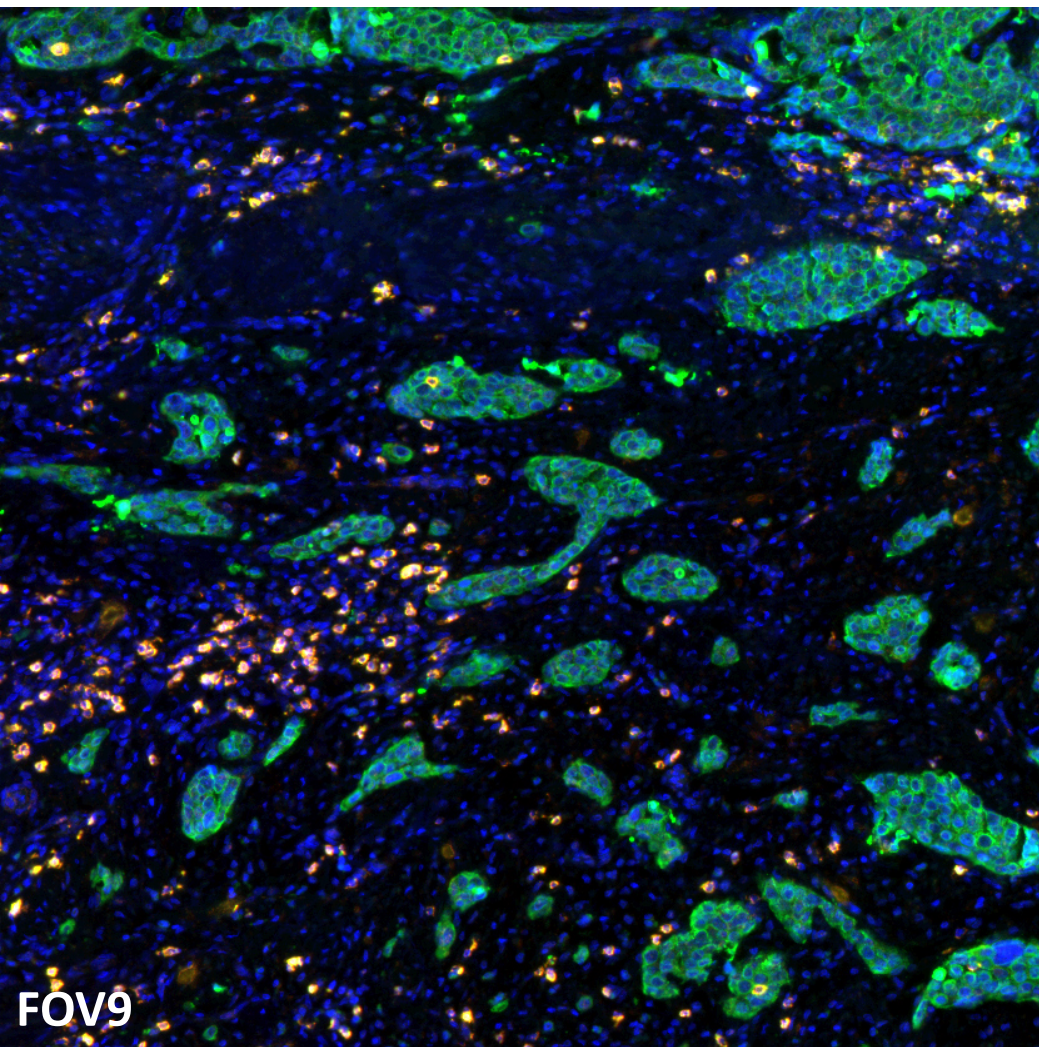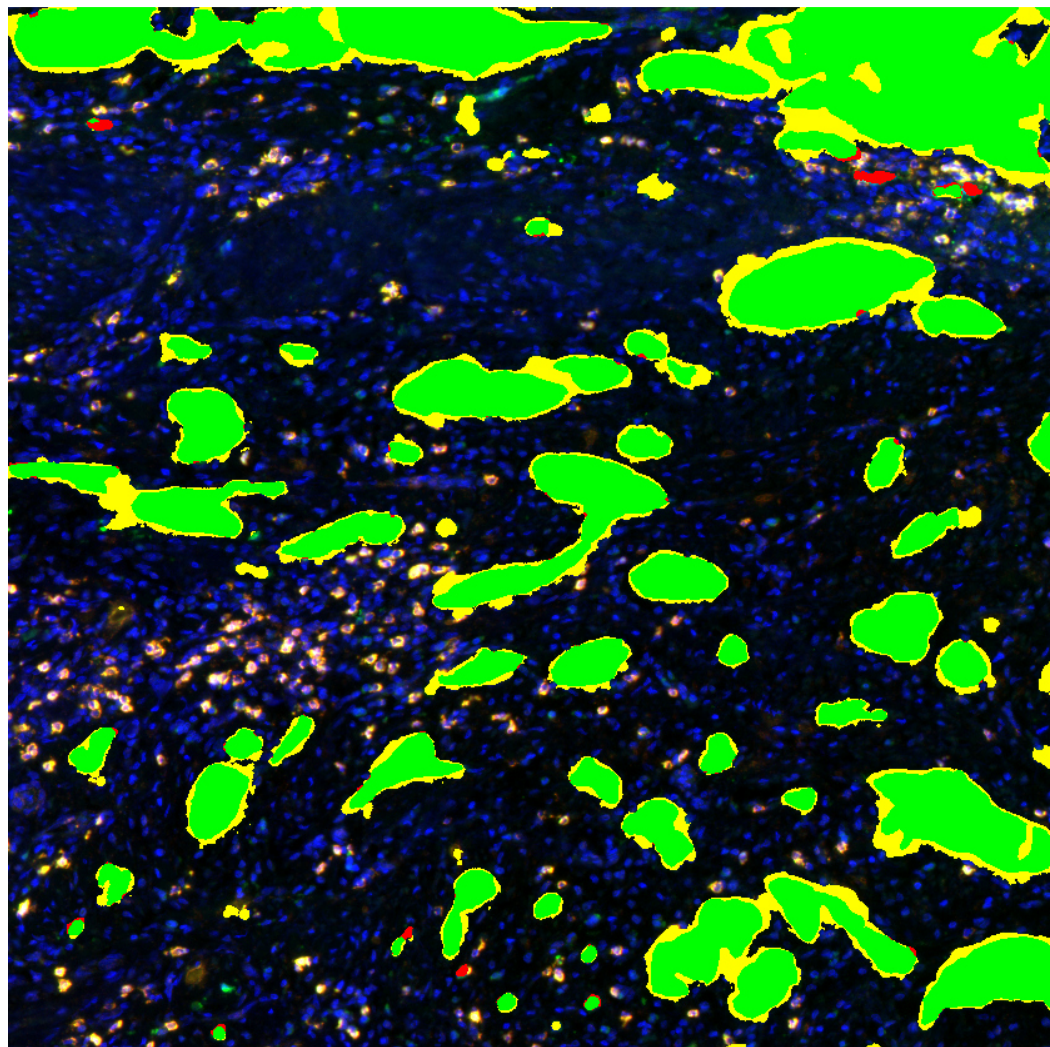

TP

FP

FN

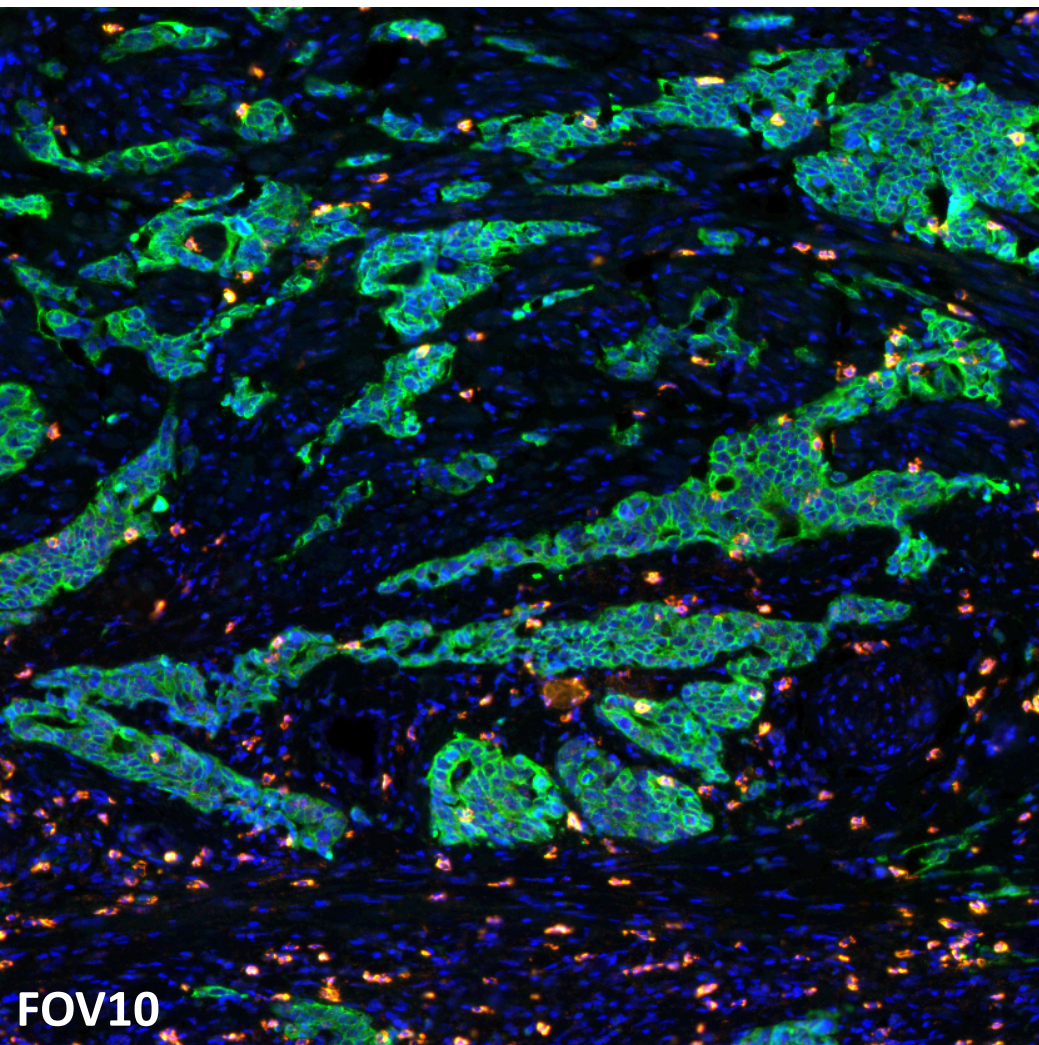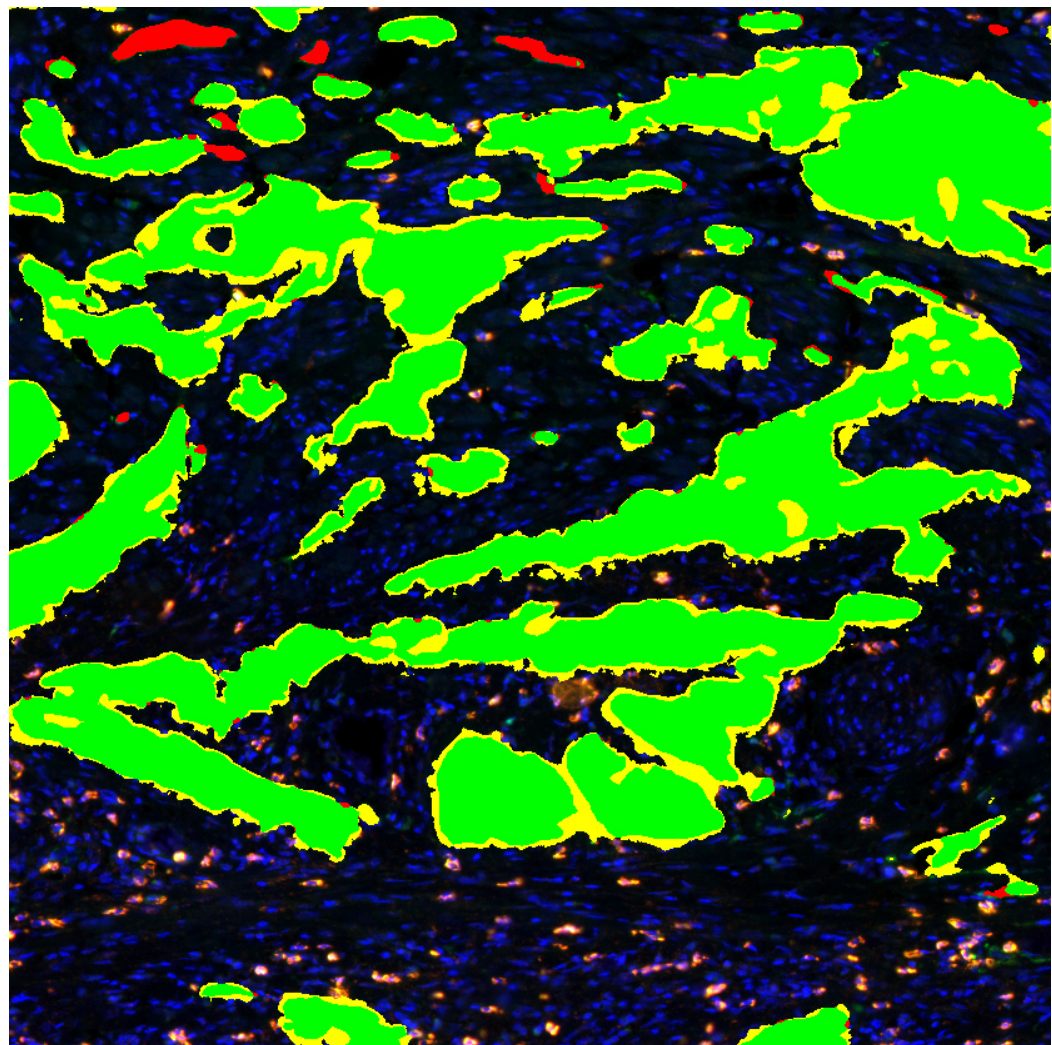

TP

FP

FN
