# Supplementary material for: Automated tumour budding quantification by machine learning augments TNM staging in muscle-invasive bladder cancer prognosis
Source: PubMed Central journal article supplement (PMC6435679; doi:10.1038/s41598-019-41595-2), 2019-03-26
Supplement: 41598_2019_41595_MOESM4_ESM.pdf [file 41598_2019_41595_MOESM4_ESM.pdf]

**Title:** Automated tumour budding quantification by machine learning augments TNM staging in muscle-invasive bladder cancer prognosis.

**Authors:** Brieu Nicolas<sup>1</sup>, Gavriel G Christos<sup>2</sup>, Nearchou P Ines<sup>2</sup>, Harrison J David<sup>2</sup>, Schmidt Günter<sup>1</sup> and Caie D Peter<sup>2\*</sup>

<sup>1</sup>Definiens AG, Bernhard-Wicki-Straße 5, 80636 München, Germany.

<sup>2</sup>School of Medicine, University of St Andrews, North Haugh, St Andrews, Fife, KY16 9TF, UK.

Brieu Nicolas and Gavriel G Christos contributed equally to this work.

**Supplementary Material M3.** Qualitative results of the nuclei detection algorithm, on the first 5 FOVs provided in supplementary materials M2-M7. Red dots indicate manually annotated nuclei, yellow dots indicate automatically detected nuclei.

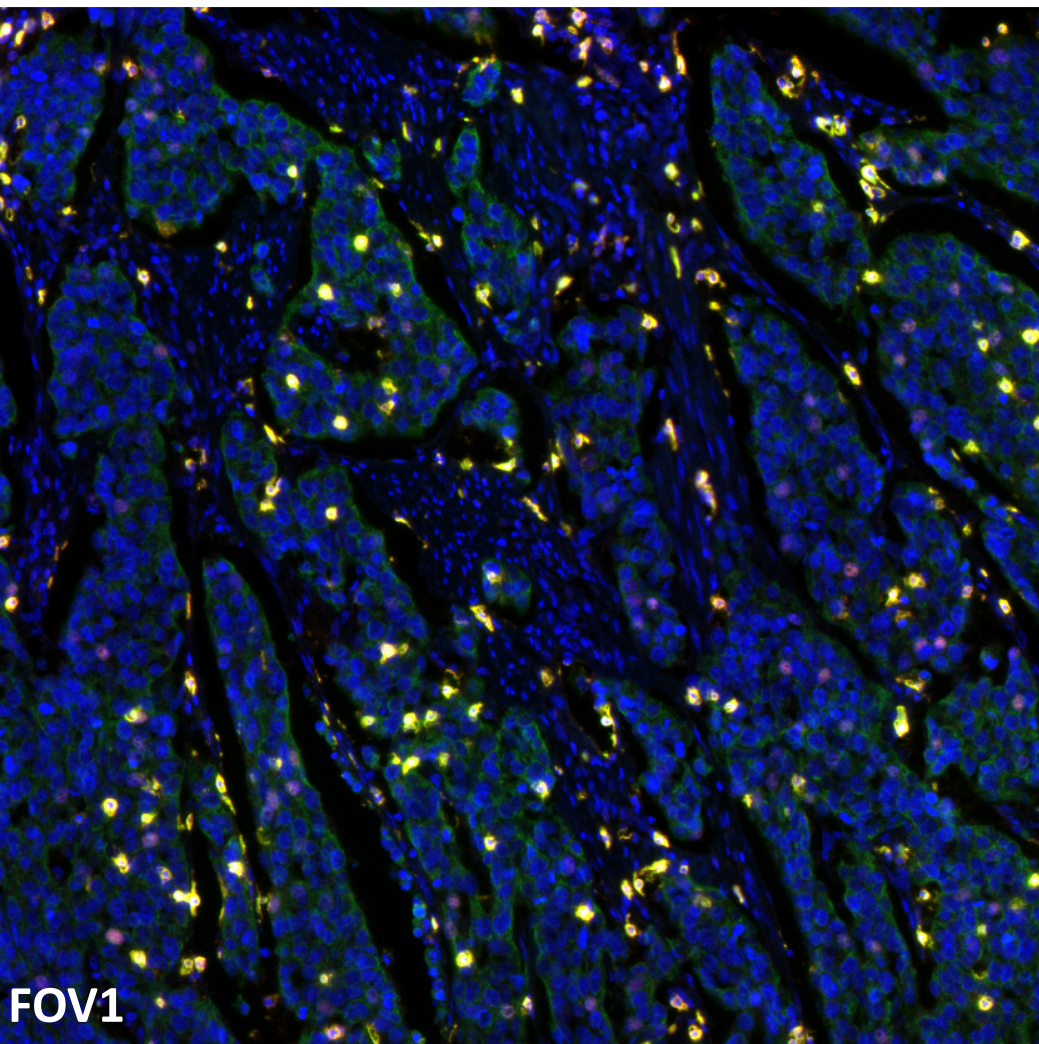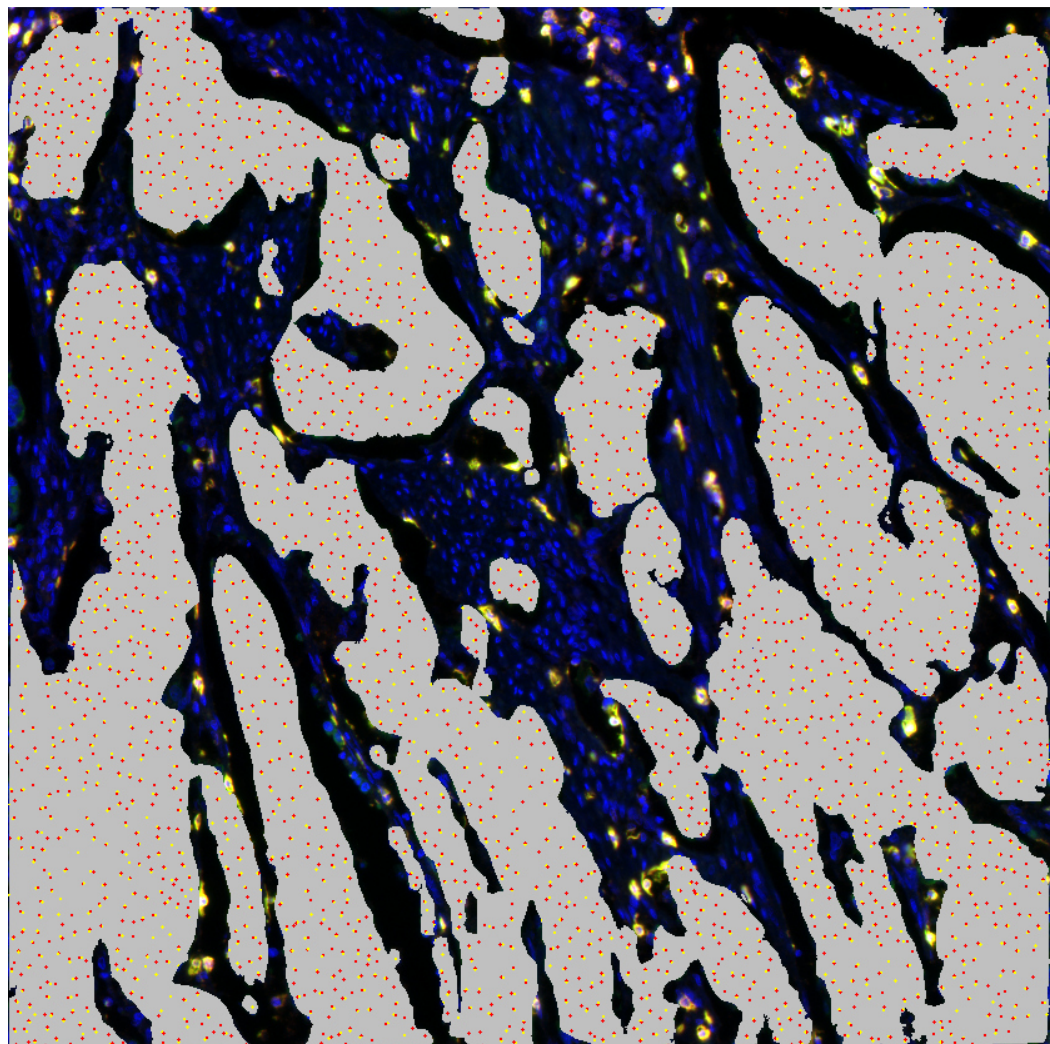

● True      ● Detected

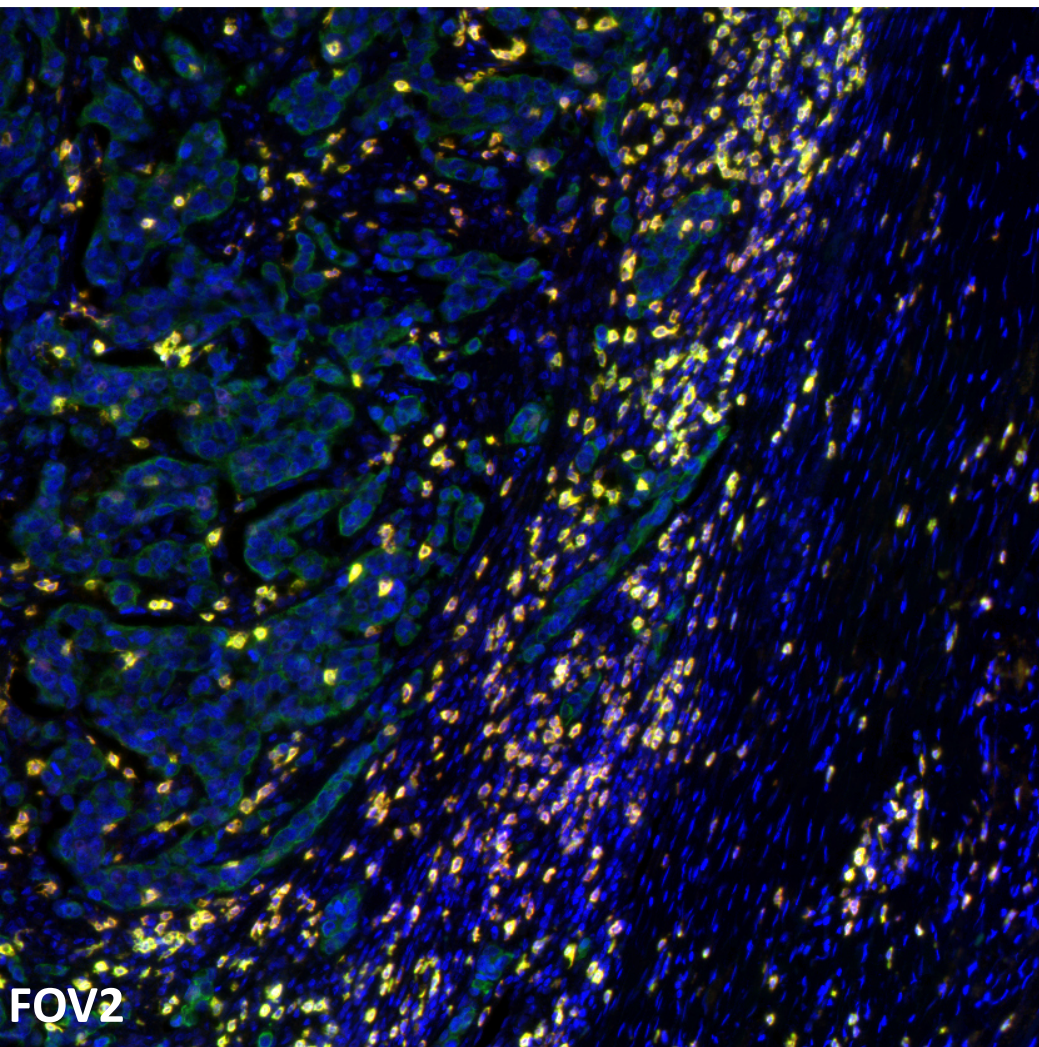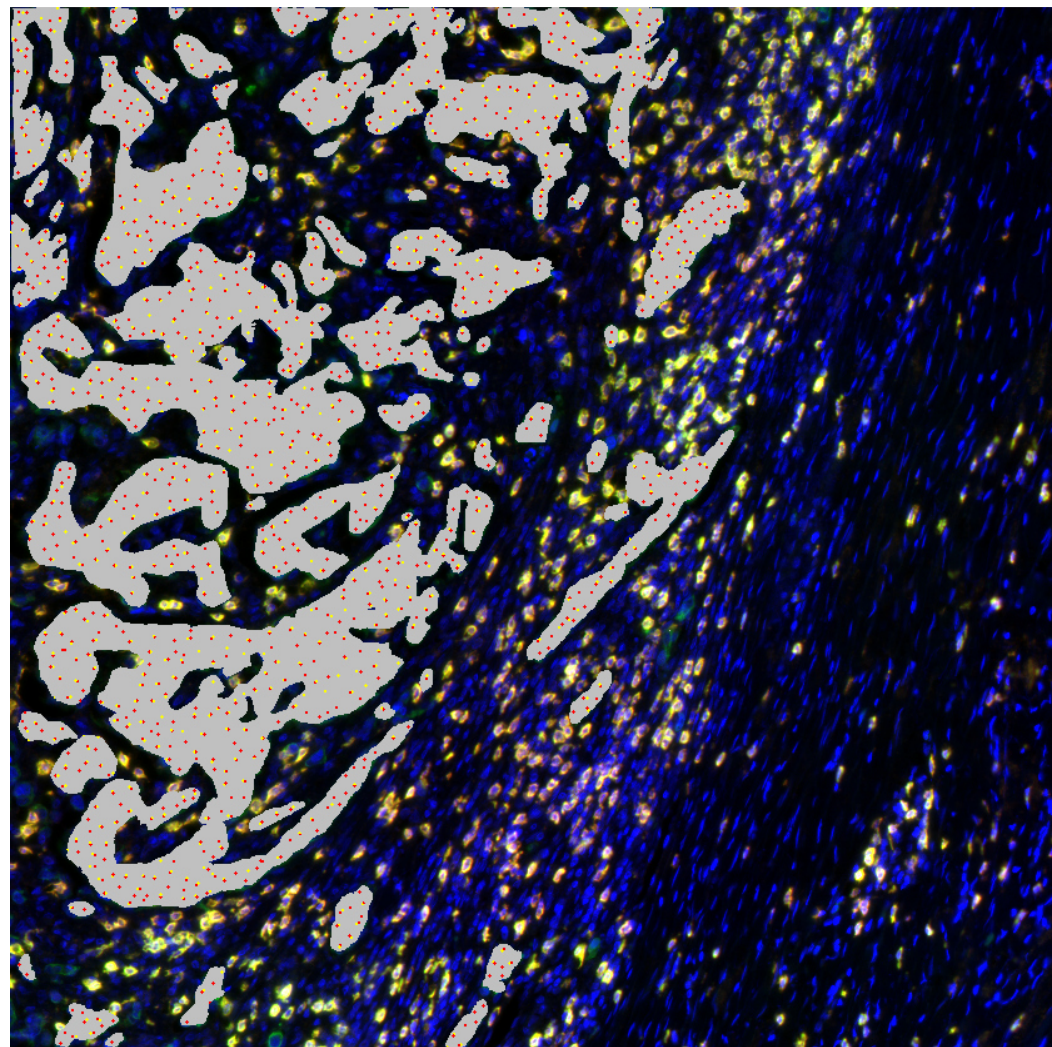

● True    ● Detected

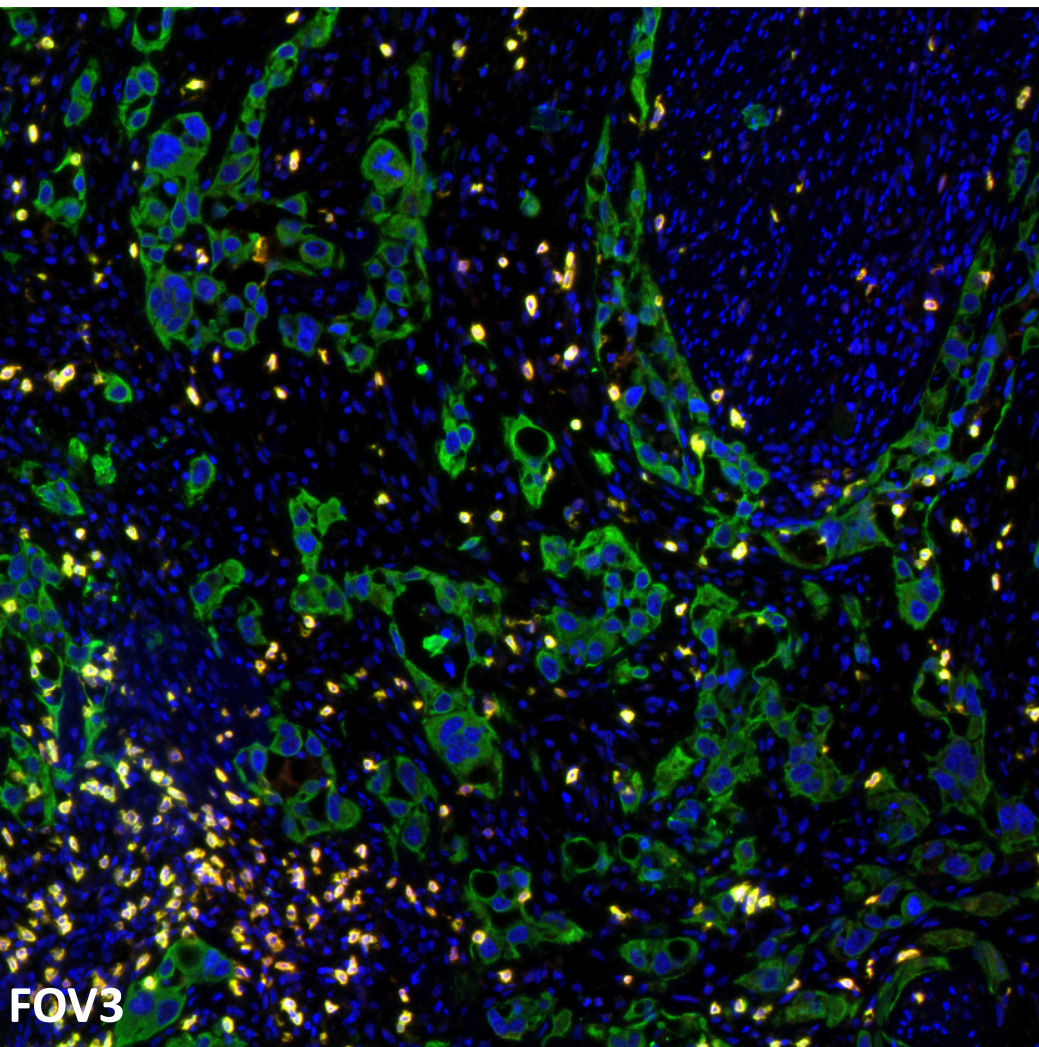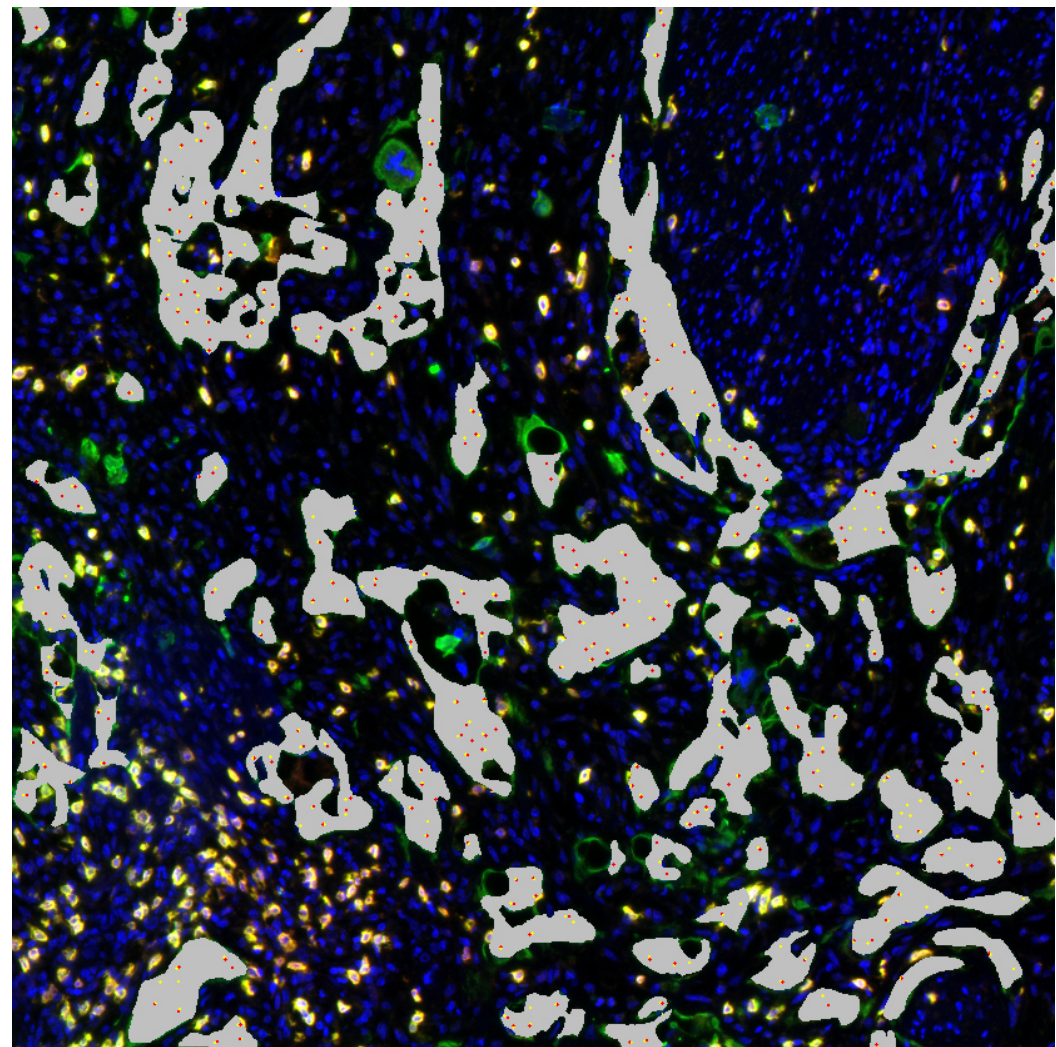

● True    ● Detected

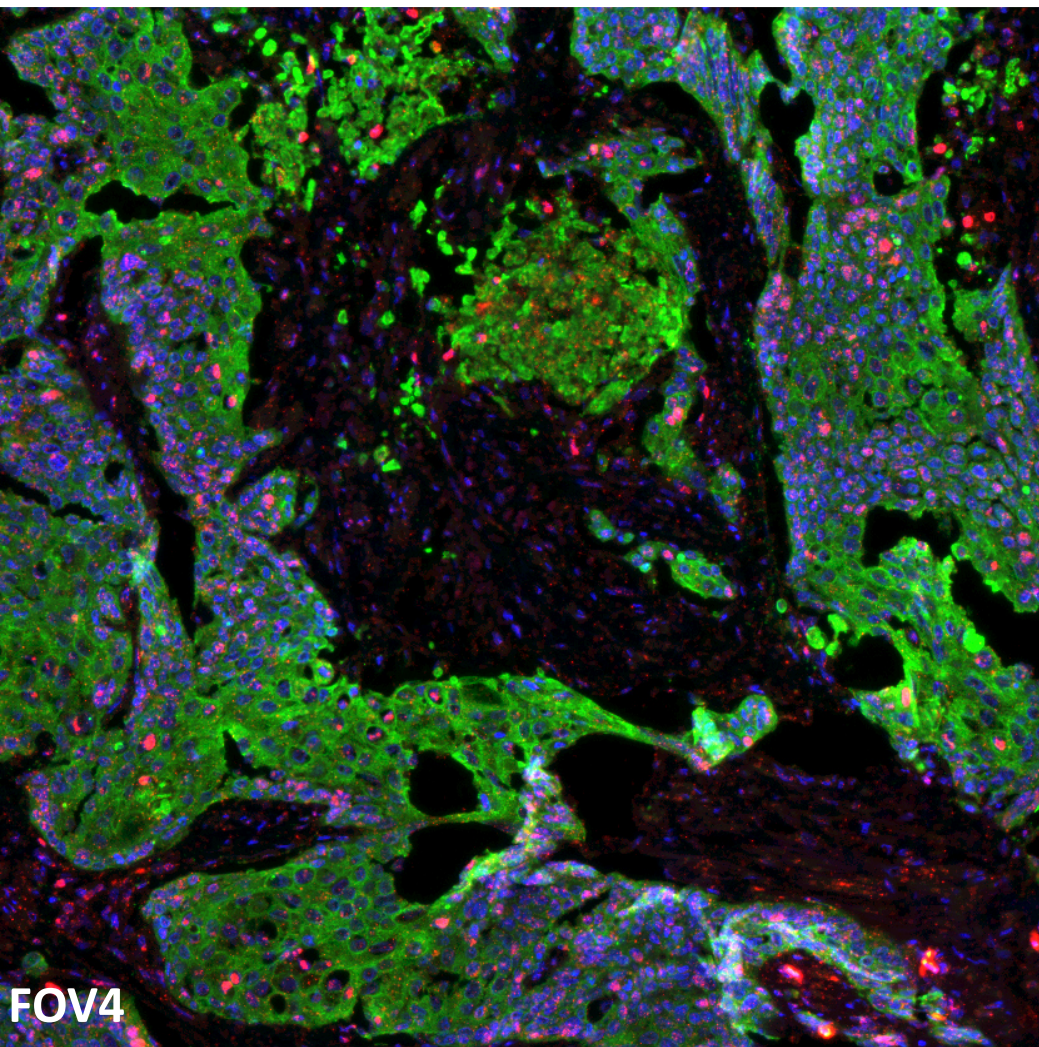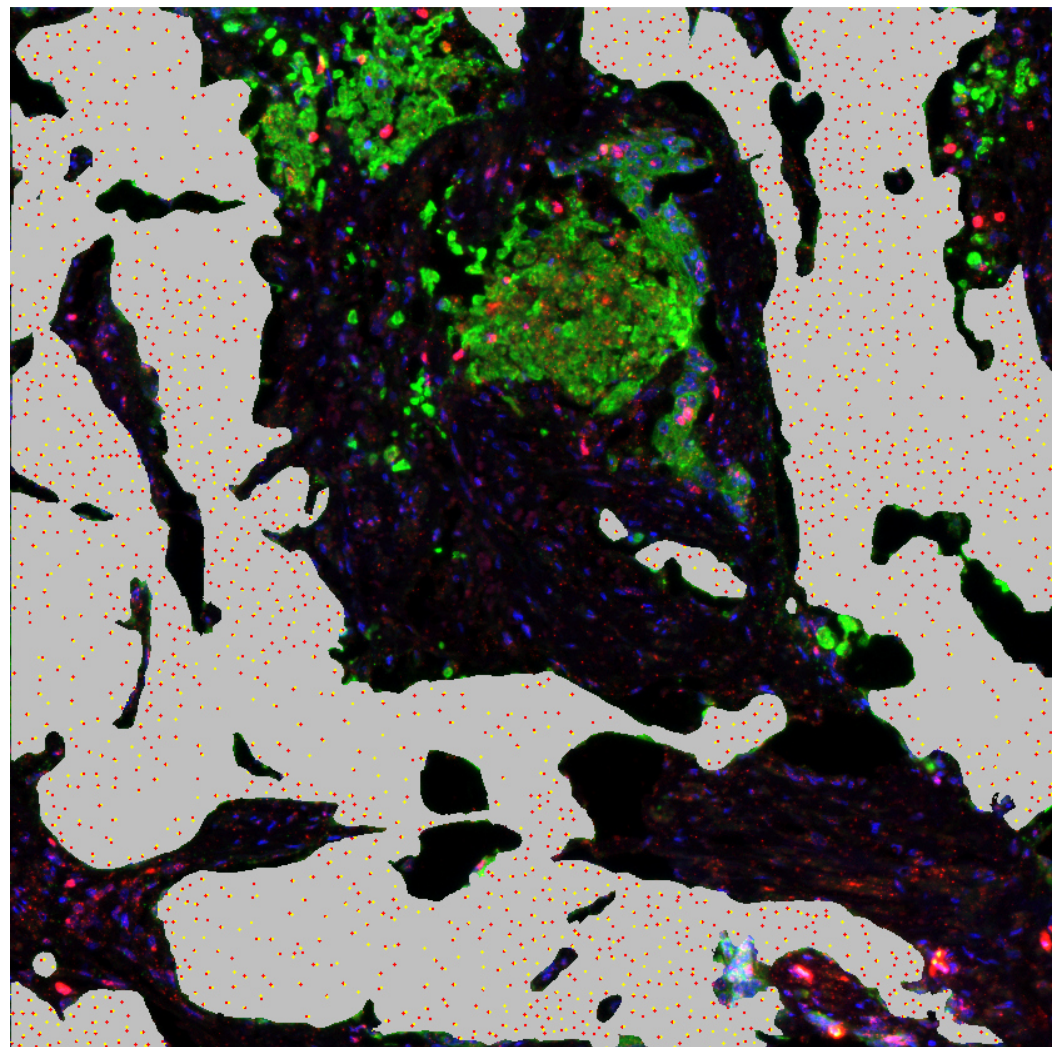

● True

● Detected

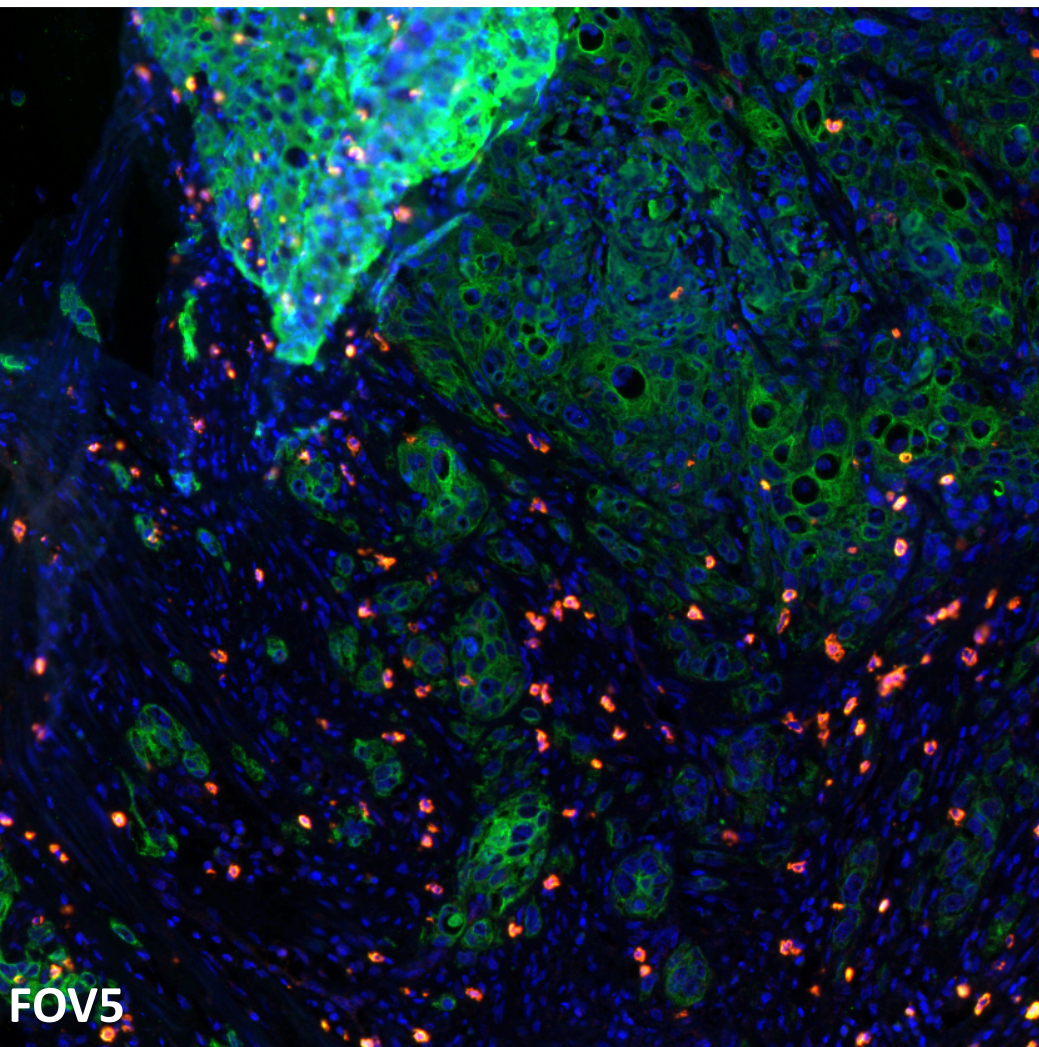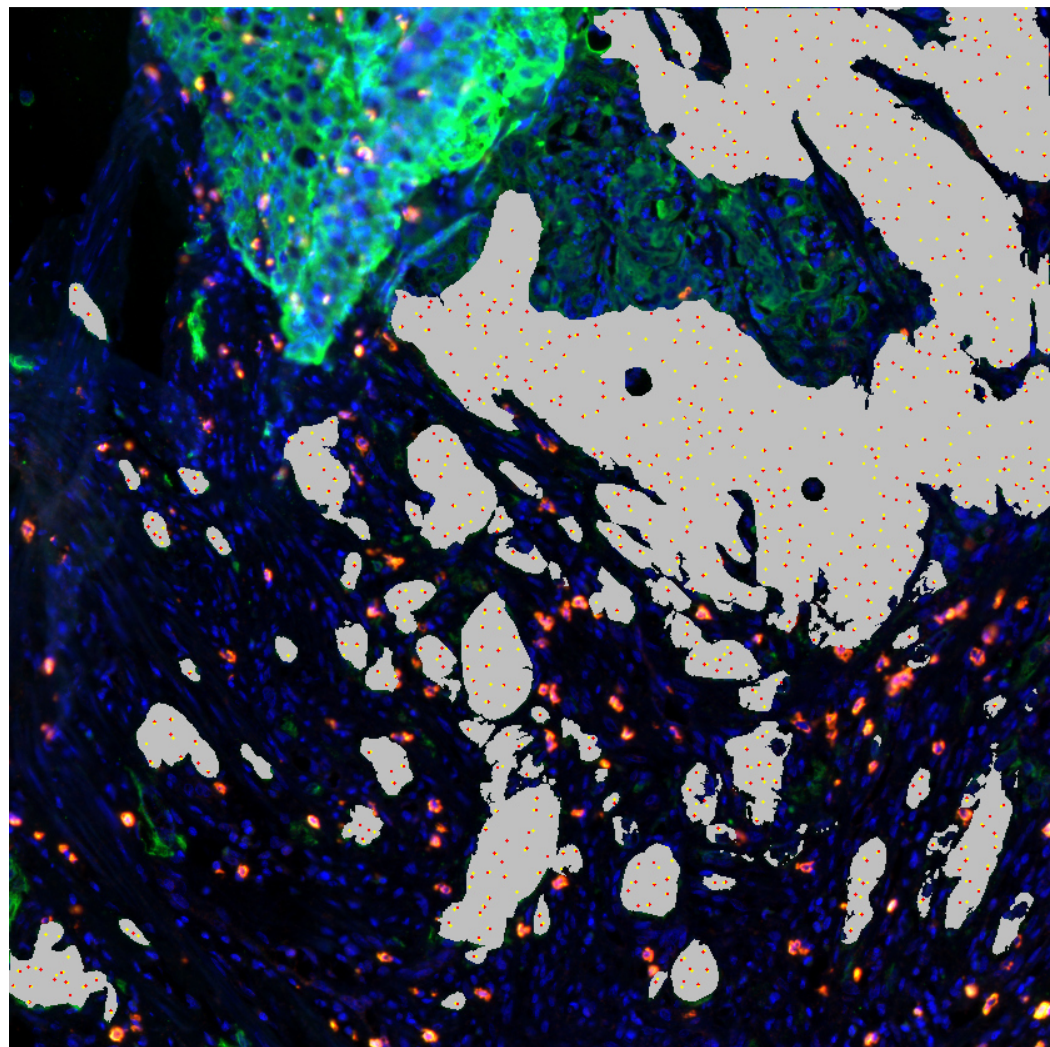

● True    ● Detected
